# Supplementary material
Source: publisher site journal article supplement (http://www.spandidos-publications.com/3865/downloadSupplementary)

Figure S1. Proliferative ability of MCF-7/S and MCF-7/A cells. Proliferative ability was significantly increased compared with that of MCF-7/S cells. \*\* $P < 0.01$  and \*\*\* $P < 0.001$ . ADM, Adriamycin; S, ADM-sensitive cells; A, ADM-resistant cells.

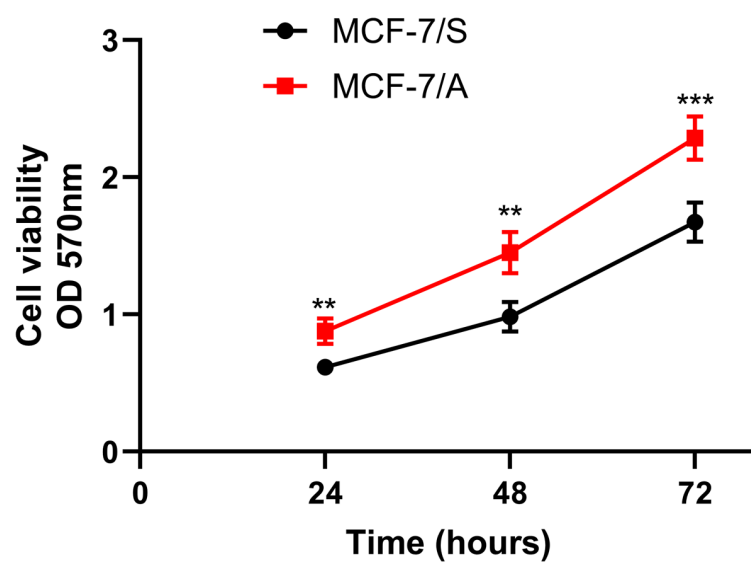

Supplement: Supplementary file 1 [file downloadSupplementary]
